# Supplementary material for: Saliva, Urine, and Anal Swabs as Viable Alternatives to Lesion Swabs for Molecular Diagnosis of Mpox
Source: Research Square preprint supplement (doi:10.21203/rs.3.rs-8467460/v1), 2026-01-12
Supplement: Supplementary file 1 [file cc23f1a544ca07ae7e1746a1.xlsx]

## Sheet: Descriptive_Age_Summary
n	mean	sd	median	iqr_low	iqr_high
120	28.3275	12.4699	28	22.5	35

## Sheet: Descriptive_Sex_Counts
sex	count
Female	63
Male	57

## Sheet: Descriptive_Category_Counts
category	count
Confirmed Positive	92
Alert	28

## Sheet: Descriptive_CT_Summary
ct_specimen	n	shapiro_p	median	iqr_low	iqr_high	mean	sd
ct_lesion_swab	100	1.86185e-06	27.585	19.885	32.865
ct_anal_swab	94	0.136334				27.2189	6.17599
ct_urine	91	0.00204349	26.7836	22.385	31.36
ct_saliva	98	0.00192798	28.325	23.585	32.235

## Sheet: Paired_CT_Wilcoxon
specimen	n_pairs	median_diff	mean_diff	sd_diff	loa_low	loa_high	W	p_value	effect_size_r
anal_swab	89	-0.22	0.382612	7.75553	-14.8182	15.5834	1892.5	0.652678	-0.0477047
urine	90	-0.0464133	0.0156724	7.43572	-14.5583	14.5897	2045	0.991974	-0.00106034
saliva	93	-0.35	0.639559	8.3186	-15.6649	16.944	1999	0.585652	-0.0565292

## Sheet: GEE_Binomial_Positivity
term	OR	CI_low	CI_high	p_value
Intercept	0.553318	0.233972	1.30854	0.177777
C(specimen)[T.anal_swab]	0.537602	0.244945	1.17992	0.121755
C(specimen)[T.urine]	0.402882	0.218753	0.741997	0.00352657
C(specimen)[T.saliva]	0.808715	0.395615	1.65317	0.560581
C(sex)[T.Male]	1.30972	0.515328	3.32868	0.570753
C(category)[T.Confirmed Positive]	49.4896	20.1044	121.825	2.07954e-17

## Sheet: GEE_Gaussian_CT
term	coef	CI_low	CI_high	p_value
Intercept	29.5841	27.654	31.5141	2.75134e-198
C(specimen)[T.anal_swab]	0.50029	-1.02634	2.02692	0.520679
C(specimen)[T.urine]	0.242035	-1.24139	1.72546	0.749131
C(specimen)[T.saliva]	0.996775	-0.633778	2.62733	0.23086
C(sex)[T.Male]	1.36951	-0.288336	3.02735	0.105429
C(category)[T.Confirmed Positive]	-3.77446	-5.40537	-2.14355	5.73332e-06

## Sheet: Equivalence_TOST_Bootstrap
specimen	diff_mean	ci90_low	ci90_high	equivalent_±0.10
anal_swab	-0.0499083	-0.108333	0	FALSE
urine	-0.0749617	-0.125	-0.0333333	FALSE
saliva	-0.0166058	-0.0666667	0.0333333	TRUE
